1 Methods Article

2 **nQMaker: estimating time non-reversible amino acid substitution models**

3

4 Cuong Cao Dang<sup>1,e</sup>, Bui Quang Minh<sup>2,e</sup>, Hanon McShea<sup>3</sup>, Joanna Mase<sup>4</sup>, Jennifer Eleanor  
5 James<sup>5</sup>, Le Sy Vinh<sup>1,\*</sup>, Robert Lanfear<sup>6</sup>

6 <sup>1</sup> University of Engineering and Technology, Vietnam National University, Hanoi, 144 Xuan  
7 Thuy, Cau Giay, 10000 Hanoi, Vietnam.

8 <sup>2</sup> School of Computing, Australian National University, Canberra, ACT 2601, Australia.

9 <sup>3</sup> Department of Earth System Science, School of Earth, Energy, and Environmental Sciences,  
10 Stanford University, Palo Alto, CA 94305, United States.

11 <sup>4</sup> Department of Ecology and Evolutionary Biology, University of Arizona, Tucson, AZ  
12 85721, United States.

13 <sup>5</sup> Department of Ecology and Genetics, Plant Ecology and Evolution, Evolutionary Biology  
14 Center, Uppsala University, Uppsala, Sweden.

15 <sup>6</sup> Department of Ecology and Evolution, Research School of Biology, Australian National  
16 University, Canberra, ACT 2601, Australia.

17 <sup>e</sup> These authors contributed equally to the work.

18 \* Corresponding author:

19 [vinhls@vnu.edu.vn](mailto:vinhls@vnu.edu.vn)

20

## 21 **Abstract**

22 Amino acid substitution models are a key component in phylogenetic analyses of protein  
23 sequences. All amino acid models available to date are time-reversible, an assumption  
24 designed for computational convenience but not for biological reality. Another significant  
25 downside to time-reversible models is that they do not allow inference of rooted trees without  
26 outgroups. In this paper, we introduce a maximum likelihood approach nQMaker, an  
27 extension of the recently published QMaker method, that allows the estimation of time non-  
28 reversible amino acid substitution models and rooted phylogenetic trees from a set of protein  
29 sequence alignments. We show that the non-reversible models estimated with nQMaker are a  
30 much better fit to empirical alignments than pre-existing reversible models, across a wide  
31 range of datasets including mammals, birds, plants, fungi, and other taxa, and that the  
32 improvements in model fit scale with the size of the dataset. Notably, for the recently  
33 published plant and bird trees, these non-reversible models correctly recovered the commonly  
34 known root placements with very high statistical support without the need to use an outgroup.  
35 We provide nQMaker as an easy-to-use feature in the IQ-TREE software  
36 (<http://www.iqtree.org>), allowing users to estimate non-reversible models and rooted  
37 phylogenies from their own protein datasets.

38 **Keywords:** amino acid substitution models; reversible models; non-reversible models;  
39 maximum likelihood model estimation; phylogenetic inference; amino acid sequence  
40 analyses

## 41 **Introduction**

42 Amino acid substitution models play an essential role in model-based phylogenetic  
43 analyses of protein sequences. Current models are typically assumed to be time reversible to

44 ensure that model and tree estimation are computationally tractable. All time reversible  
45 models are also stationary, meaning that amino acid frequencies are at the equilibrium of the  
46 substitution matrix  $Q$  of transition rates between them. Time reversible models also obey  
47 detailed balance, i.e. fluxes between any pair of amino acids have equal magnitude in both  
48 directions. Software such as FastMG (Dang, et al., 2014) and QMaker (Minh, et al., 2021)  
49 can estimate time reversible models from collections of many multiple sequence alignments  
50 (MSAs). While mathematically convenient, there is evidence that the assumption of time  
51 reversibility may be violated (Squartini & Arndt, 2008; Naser-Khdour, et al., 2019). The  
52 challenge has been in implementing software that is computationally efficient enough to  
53 estimate time non-reversible models. If non-reversible models are a better fit to the data than  
54 reversible models, we should expect to see concomitant improvements in the estimation of  
55 tree topologies and branch lengths in phylogenetic analyses.

56 Another benefit of non-reversible models is that they allow the root of a phylogenetic  
57 tree to be estimated in the absence of an outgroup (Naser-Khdour, et al., 2021; Bettisworth &  
58 Stamatakis, 2021). Rooting trees is an important part of studying evolutionary relationships  
59 among species. Unfortunately, the time reversible models limit maximum likelihood (ML)  
60 methods to construct only unrooted trees since the likelihood of the tree remains the same  
61 regardless of the root position. To circumvent this limitation, most studies use outgroups to  
62 root phylogenetic trees (Maddison, et al., 1984; Huelsenbeck, et al., 2002). However, finding  
63 an appropriate outgroup for the clade under study can still a challenge in practice (Pearson, et  
64 al., 2013). Non-reversible models remove the need for an outgroup because the root position  
65 is a parameter of the model, and different rooting positions will have different likelihoods.  
66 Recent studies based on simulated and empirical data reveal encouraging results of using  
67 non-reversible models in rooting phylogenies (Naser-Khdour, et al., 2021; Bettisworth &  
68 Stamatakis, 2021).

69           We recently introduced QMaker (Minh, et al., 2021), a software tool that allows users  
70 to efficiently estimate reversible models from large datasets. We showed that the algorithms  
71 in QMaker improve on existing methods (Le & Gascuel, 2008; Whelan & Goldman, 2001),  
72 and used QMaker to estimate a suite of new reversible matrices that can be applied to  
73 empirical data. QMaker uses a number of approaches to make it computationally feasible to  
74 rapidly estimate new Q matrices from large collections of empirical alignments, but was  
75 restricted to estimating only time-reversible Q matrices.

76           In this paper, we present nQMaker, which extends QMaker to allow the estimation of  
77 stationary non-reversible models from large collections of alignments. nQMaker combines a  
78 tree search strategy to determine rooted maximum likelihood trees during the model  
79 estimation process and a ML algorithm to estimate 379 parameters of non-reversible models  
80 (instead of 179 parameters of reversible models) based on these rooted trees. We applied  
81 nQMaker to estimate six stationary non-reversible models from Pfam and five clade-specific  
82 datasets for mammals, birds, insects, yeasts, and plants. Our results show that stationary non-  
83 reversible models not only improve the fit between the model and data, but also accurately  
84 infer rooted phylogenomic trees in those cases where we had confident *a priori* knowledge of  
85 the root position from other empirical analyses.

## 86 **Material and methods**

### 87 ***Datasets***

88           We used the general Pfam database (seed alignments version 31) and the same five  
89 clade-specific datasets as used in the QMaker paper (i.e., Plant, Bird, Mammal, Insect, and  
90 Yeast). The Pfam dataset consists of 13,308 MSAs from 1,150,099 sequences including  
91 3,433,343 sites. The Pfam dataset was randomly divided into training and testing sets each  
92 containing 6,654 MSAs. The clade-specific datasets contain between 1,308 (Plant) and 7,295

93 (Bird) loci, and between 38 (Plant) and 343 (Yeast) sequences. For each clade-specific  
94 dataset, we randomly selected 1,000 MSAs for estimating a non-reversible model and used  
95 the remaining MSAs for testing the estimated model. We filtered out small loci with less than  
96 50 sites in the Insect dataset (no other datasets contained loci with less than 50 sites).

97 The six datasets are summarized in Table 1 and available from the online supplementary  
98 material at (<https://doi.org/10.6084/m9.figshare.14516712>).

99 **Table 1.** Six datasets using for training and testing non-reversible models.

| Dataset | #Sequences | #Sites    | Training | Testing | Reference                 |
|---------|------------|-----------|----------|---------|---------------------------|
| Pfam    | 1,150,099  | 3,433,343 | 6,654    | 6,654   | (El-Gebali, et al., 2018) |
| Bird    | 52         | 4,519,041 | 1,000    | 6,295   | (Jarvis, et al., 2015)    |
| Insect  | 144        | 595,033   | 1,000    | 1,482   | (Misof, et al., 2014)     |
| Mammal  | 90         | 3,050,199 | 1,000    | 3,162   | (Wu, et al., 2018)        |
| Plant   | 38         | 432,014   | 1,000    | 308     | (Ran, et al., 2018)       |
| Yeast   | 343        | 1,162,805 | 1,000    | 1,408   | (Shen, et al., 2018)      |

100

## 101 *Methods*

102 The amino acid substitution process is modeled by a time-homogeneous, time-  
103 continuous Markov process and represented by a  $20 \times 20$  matrix  $Q = \{q_{xy}\}$  where  $q_{xy}$  is the  
104 number of substitutions between the two different amino acids  $x$  and  $y$  per time unit  
105 (diagonal values  $q_{xx}$  are assigned such that the sum of all elements on row  $x$  of  $Q$  equals  
106 zero). In phylogenetic inference, the branch lengths reflect the number of substitutions per  
107 site, thus, the  $Q$  matrix is normalized by dividing the factor  $\mu$ , where  $\mu = -\sum \pi_x q_{xx}$ , and  
108  $\pi_x$  is the equilibrium frequency of 20 amino acids.

109 The  $Q$  matrix is used to calculate transition probabilities between amino acids.  
110 Specifically, the so-called transition probability matrix  $P(t) = \{p_{xy}(t)\}$  where  $p_{xy}(t)$  is the

111 probability of changing from amino acid  $x$  to amino acid  $y$  after  $t$  substitutions can be  
112 calculated as follows:

$$113 \quad P(t) = e^{Qt} \quad (1)$$

114 In a time-reversible model, the exchangeability rates between amino acid  $x$  and amino  
115 acid  $y$  are the same in both directions. We can only infer unrooted trees with time-reversible  
116 models because the likelihood of the tree remains the same regardless of the root placement  
117 (Felsenstein, 1981). The reversible  $Q$  matrix can be decomposed into a symmetric  
118 exchangeability rate matrix  $R = \{r_{xy}\}$  and  $\Pi = \{\pi_x\}$  such that  $q_{xy} = \pi_y r_{xy}$  if  $x \neq y$ ,  
119 otherwise,  $q_{xx} = -\sum_y q_{xy}$ . Thus, a reversible model consists of 208 free parameters (i.e.,  
120 189 parameters from the  $R$  matrix, and 19 parameters from  $\Pi$  vector).

121 If the  $Q$  matrix can be diagonalized, the matrix  $P(t)$  is efficiently calculated as follows:

$$122 \quad P(t) = U \times e^{At} U^{-1} \quad (2)$$

123 where  $\mathbf{A}$  is the diagonal matrix of eigenvalues of  $Q$ ;  $U$  is the matrix of eigenvectors of  $Q$  and  
124  $U^{-1}$  is its inverse matrix.

125 In this paper, we relax the time-reversible assumption in estimating amino acid  
126 substitution models by estimating all 379 parameters of the  $Q$  matrix. The transition  
127 probability matrix  $P(t)$  can be calculated using a combination of eigen-decomposition and  
128 scaling-squaring techniques provided by the Eigen3 library (Guennebaud and Jacob 2010)  
129 and implemented in IQ-TREE 2 (Minh, et al., 2020). Specifically, IQ-TREE 2 uses eigen-  
130 decomposition to diagonalize  $Q$  into its (complex) eigenvalues, eigenvectors and inverse  
131 eigenvectors to calculate  $P(t)$  using Equation 2. If  $Q$  is not diagonalizable, then IQ-TREE 2  
132 employs the scaling-squaring technique to compute  $P(t)$  based on the second order Taylor  
133 expansion of Equation 1.

134 Given a dataset  $\mathbf{D} = \{D_1, \dots, D_n\}$  consisting of  $n$  multiple amino acid sequence  
135 alignments, let  $\mathbf{T} = \{T_1, \dots, T_n\}$  be the tree set corresponding to the dataset  $\mathbf{D}$ , i.e.,  $T_i$  is the ML  
136 tree of alignment  $D_i$ . The ML estimation method determines the tree set  $\mathbf{T}$  and a model  $Q$  to  
137 maximize the likelihood value  $L(Q, \mathbf{T}; \mathbf{D})$ . We assume that amino acid substitutions among  
138 alignments and sites are independent, thus, the likelihood value  $L(Q, \mathbf{T}; \mathbf{D})$  can be calculated  
139 as follows:

$$140 \quad L(Q, \mathbf{T}; \mathbf{D}) = \prod_{i=1}^n L(Q, T_i; D_i) = \prod_{i=1}^n \prod_{j=1}^{l_i} L(Q, T_i; D_{ij}) = \prod_{i=1}^n \prod_{j=1}^{l_i} P(D_{ij}|Q, T_i) \quad (3)$$

141 where  $l_i$  is the length of alignment  $D_i$ ; and  $D_{ij}$  is the data at site  $j$  of alignment  $D_i$ . The  
142 likelihood value  $L(Q, T_i; D_{ij})$  can be calculated by the conditional probability  $P(D_{ij}|Q, T_i)$  of  
143 data  $D_{ij}$  given the model  $Q$  and the tree  $T_i$ .

144 As amino acid substitution rates vary among sites, we incorporate the site rate  
145 heterogeneity by determining site rate models  $\mathbf{V} = \{V_1, \dots, V_n\}$  for alignments  $\mathbf{D}$ , i.e.,  $V_i$  is the  
146 site rate model of alignment  $D_i$ . Typically, a site rate model combines a  $\Gamma$  distribution of  
147 rates, a proportion of invariant sites (Yang, 1993; Gu, et al., 1995), or a distribution-free rate  
148 models (Yang, 1995). The best-fit rate model for each MSA or locus was determined by  
149 using ModelFinder (Kalyaanamoorthy et al. 2017). The likelihood value  $L(Q, \mathbf{T}, \mathbf{V}; \mathbf{D})$  is now  
150 technically calculated as follows:

$$151 \quad L(Q, \mathbf{T}, \mathbf{V}; \mathbf{D}) = \prod_{i=1}^n \prod_{j=1}^{l_i} L(Q, T_i, V_i; D_{ij}) = \prod_{i=1}^n \prod_{j=1}^{l_i} P(D_{ij}|Q, T_i, V_i) \quad (4)$$

152 where  $P(D_{ij}|Q, T_i, V_i)$  is the conditional probability of data  $D_{ij}$  given the model  $Q$ , the tree  $T_i$ ,  
153 and the site rate model  $V_i$ .

154           The maximum likelihood estimation method determines parameters of the model  $Q$ ,  
155 the trees  $\mathbf{T}$  and the site rate models  $\mathbf{V}$  to optimize the likelihood value  $L(Q, \mathbf{T}, \mathbf{V}; \mathbf{D})$  in  
156 Equation 4.

### 157 *Using nQMaker to estimate non-reversible models*

158           Estimating the  $Q$  matrix is computationally difficult because we have to  
159 simultaneously estimate its parameters, the trees  $\mathbf{T}$ , and the site rate models  $\mathbf{V}$ . A number of  
160 approximate maximum-likelihood methods have been proposed to estimate model  $Q$  from  
161 large datasets (Minh, et al., 2021; Whelan & Goldman, 2001; Le & Gascuel, 2008; Dang, et  
162 al., 2014). The methods show that the parameters of  $Q$  can be accurately estimated using  
163 nearly optimal trees  $\mathbf{T}$  and site rate models  $\mathbf{V}$ . Thus, we can iteratively estimate the model  $Q$ ,  
164 the trees  $\mathbf{T}$ , and site rate models  $\mathbf{V}$  to optimize the likelihood value  $L(Q, \mathbf{T}, \mathbf{V}; \mathbf{D})$ . Currently,  
165 QMaker (Minh, et al., 2021) has been shown to efficiently estimate reversible models using  
166 this approach.

167           The nQMaker approach presented here extends QMaker to estimate non-reversible  
168 models from large datasets including MSAs. It composes of five main steps as illustrated in  
169 Figure 1 and described as follows:

- 170           1. Initialize a set of candidate matrices  $\mathbf{Q}$ ; typically we use LG (Le & Gascuel, 2008),  
171           JTT (Jones DT, 1992), and WAG (Whelan & Goldman, 2001) as three initial  
172           matrices. Set the current best matrix  $Q^{BEST} := LG$ .
- 173           2. For each  $D_i$ , determine  $Q_i \in \mathbf{Q}$  as the best-fit matrix,  $V_i$  as the best site rate model,  
174           then employ IQ-TREE 2 to estimate an ML tree  $T_i$  based on  $Q_i$  and  $V_i$  (if  $Q_i$  is non-  
175           reversible,  $T_i$  is a rooted tree). Let  $\mathcal{T}_i$  and  $\mathcal{L}_i$  be the topololgy and branch lengths of  
176           tree  $T_i$ , respectively. For clade-specific datasets, instead of constructing a separate



177 topology  $\mathcal{T}_i$  for each locus, we estimate only one edge-linked topology  $\mathcal{T}$  across all  
178 loci.

179 3. With  $V_i$  and  $\mathcal{T}_i$  fixed, estimate  $Q^{NEW}$  and  $\mathcal{L}_i$  to maximize the log-likelihood function.

180 Precisely, we iterate two sub-steps:

181 3a. With  $V_i$ ,  $\mathcal{T}_i$ , and  $\mathcal{L}_i$  fixed, estimate  $Q^{NEW}$ .

182 3b. With  $V_i$ ,  $\mathcal{T}_i$ , and  $Q^{NEW}$  fixed, estimate  $\mathcal{L}_i$ . If the log-likelihood is increased  
183 more than 0.1, go to step 3a, otherwise, go to the next step.

184 4. Assign  $Q^{BEST} := Q^{NEW}$ . If the Pearson correlation coefficient between  $Q^{BEST}$  and  
185  $Q^{NEW}$  is less than 0.999, add  $Q^{BEST}$  to the set of candidate matrices  $\mathbf{Q}$ , repeat from  
186 step 2. Otherwise, return  $Q^{BEST}$  as the final matrix for the database  $\mathbf{D}$ .

187 The key difference between nQMaker and QMaker is that nQMaker uses rooted  
188 maximum likelihood trees to estimate the 379 parameters of non-reversible models, rather  
189 than using unrooted trees to estimate the 189 parameters of reversible models in QMaker.  
190 Experiments on large datasets show that the estimation process usually stops after three  
191 iterations.

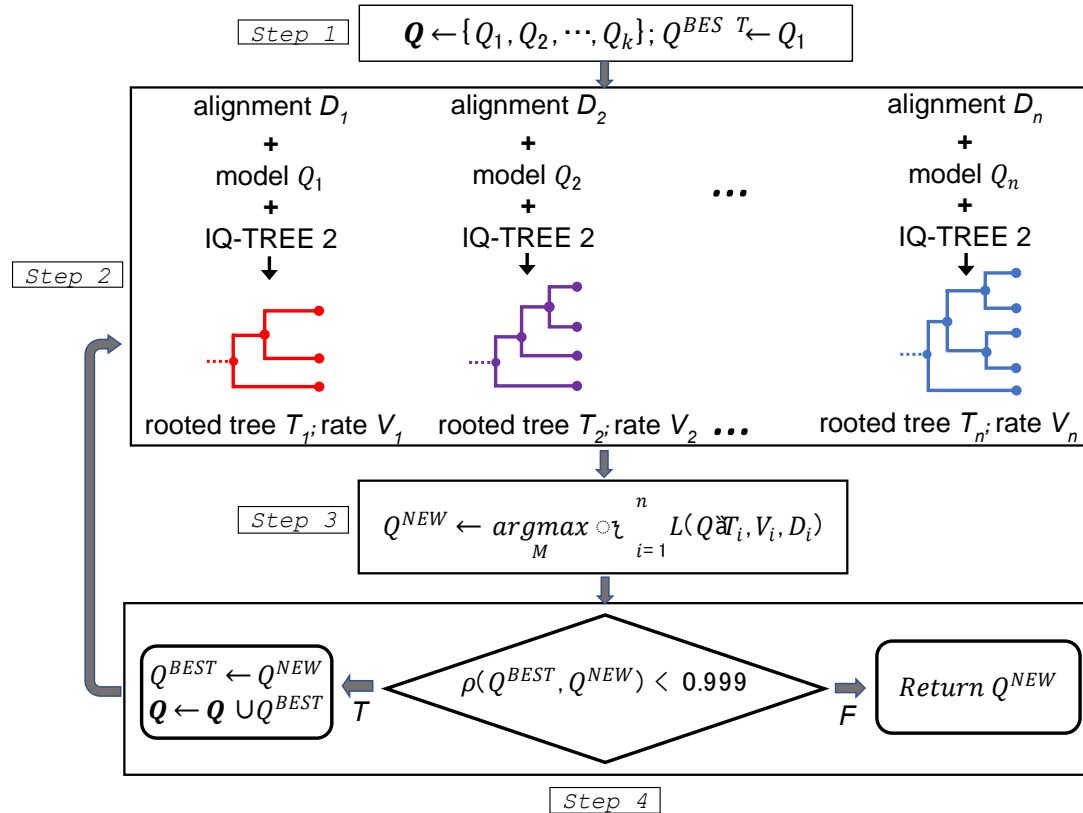

192

193 **Figure 1:** The flowchart of nQMaker to estimate a time non-reversible model from a  
 194 collection of multiple protein sequence alignments.

195 **Model estimation**

196 We used nQMaker to estimate non-reversible models (denoted NQ) from the training sets of  
 197 six datasets, i.e., NQ.pfam for Pfam, NQ.plant for Plant, NQ.bird for Bird, NQ.insect for  
 198 Insect, NQ.mammal for Mammal and NQ.yeast for Yeast. The reversible models for the  
 199 datasets (Q.pfam, Q.plant, Q.bird, Q.insect, Q.mammal and Q.yeast) were obtained from the  
 200 QMaker paper (Minh, et al., 2021). We compared non-reversible models and reversible  
 201 models on testing sets using Akaike information criterion (AIC) values (Akaike, 1974). All  
 202 models were tested with rate models “+G4” ( $\Gamma$  distribution with four categories), “+I”  
 203 (invariant site model), and “+Rc” (distribution-free rate model with  $c$  categories). The  
 204 reversible models were also tested with “+F” option (i.e., amino acid frequencies were

205 directly estimated from testing data). Note that each non-reversible model is represented by a  
206 single matrix  $Q$ , therefore “+F” option is not valid for non-reversible models.

207 The non-reversible model for the Pfam dataset was estimated with two commands in IQ-  
208 TREE 2:

```
209 iqtree2 -S ALN_DIR -mset LG,WAG,JTT -cmax 4
```

```
210 iqtree2 -S ALN_DIR.best_model.nex -te ALN_DIR.treefile --  
211 model-joint NONREV+FO
```

212 where `-S ALN_DIR` option specifies the directory of training data; `-mset LG,WAG,JTT`  
213 option defines the initial candidate matrices to reduce computational burden; `-cmax 4`  
214 option restricts up to four categories for the rate heterogeneity across sites. The first  
215 command outputs the best models to `ALN_DIR.best_model.nex` and the best trees to  
216 `ALN_DIR.treefile`. These files are then used as the input for the second command,  
217 which estimates a join non-reversible  $Q$  matrix across all input alignments.

218 For clade-specific datasets, we used `-p` option instead of `-S` option to estimate an edge-  
219 linked partition model with a single tree topology shared across all loci. This `-p` option is  
220 typically used for the estimation of trees using concatenated sequences, assuming a single  
221 species tree but rescaling the branch lengths of the individual single-locus trees. Previous  
222 work has shown that edge-linked partitioned models usually perform best among among a  
223 range of related options (Duchêne, et al., 2019).

## 224 **Results**

225 *Non-reversible models generally provided much better fit to the data than reversible models*

226 First, we compared the non-reversible (NQ) and reversible (Q) models on the test  
227 alignments of the Pfam, bird, mammal, insect, plant and yeast datasets. Recall that the test  
228 alignments were not used to estimate the NQ matrices, ensuring that they can be used as  
229 unbiased datasets with which to compare the performance of the NQ models to other models.  
230 For each dataset, we counted the number of test alignments for which the NQ model was  
231 better than the Q model using the AIC. Table 2 shows that the NQ models fit the data better  
232 than the Q models for all clade-specific datasets, typically being selected as the best fit model  
233 for 60-70% of the test alignments. For the Pfam dataset, the reversible model Q.pfam  
234 outperformed the non-reversible model NQ.pfam, with the former being the best fit for two-  
235 thirds of the test alignments.

236 We suspected that the poor performance of NQ.pfam might be caused by a large  
237 number of small Pfam alignments (76% of Pfam test alignments have  $\leq 100$  sequences).  
238 This is supported by post-hoc data analysis, which shows that the NQ.pfam model  
239 outperformed the Q.pfam model in just 26% of small test alignments (with  $\leq 100$  sequences)  
240 but in 56% of large test alignments (with  $> 100$  sequences). The median size of alignments  
241 best fit by NQ.pfam (78 sequences) is much larger than the median size of alignments best fit  
242 by Q.pfam (26 sequences). We further examined the effect of the number of sequences in the  
243 alignment on the model fit of NQ.pfam by classifying test alignments in Pfam into 10 subsets  
244 (bins) by the number of sequences such that  $i^{th}$  ( $i = 0 \dots 9$ ) bin contains all test alignments  
245 with  $(i \times 100 + 1)$  to  $(i \times 100 + 100)$  sequences. We calculated the Spearman correlation  
246 between the rank of the bin and the proportion of alignments in the bin which are best fit by  
247 NQ.pfam. The Spearman correlation value is 0.903 indicating that the model fit of NQ.pfam  
248 increases with the number of sequences in testing alignments.

249

250 **Table 2.** The number of alignments where the NQ and Q models were selected as best-fit on  
251 six datasets. For example, the NQ model outperformed the Q model on 61.87% of testing  
252 alignments in the Bird dataset.

|           | <b>Pfam</b>      | <b>Bird</b>      | <b>Insect</b>    | <b>Mammal</b>    | <b>Plant</b>    | <b>Yeast</b>    |
|-----------|------------------|------------------|------------------|------------------|-----------------|-----------------|
| <i>NQ</i> | 2218<br>(33.33%) | 3895<br>(61.87%) | 1001<br>(67.54%) | 1950<br>(61.67%) | 190<br>(61.69%) | 869<br>(61.72%) |
| <i>Q</i>  | 4436<br>(66.67%) | 2400<br>(38.13%) | 481<br>(32.46%)  | 1212<br>(38.33%) | 118<br>(38.31%) | 539<br>(38.28%) |

253 Second, we compared 10 different models including six non-reversible models, three  
254 general models (JTT, LG, and WAG), and one best-fit reversible model for each testing  
255 dataset (e.g. Q.pfam for Pfam or Q.plant for Plant). Similar to the results above, these results  
256 show that the non-reversible models performed best for the clade-specific datasets, but not for  
257 the Pfam dataset (Figure 2). In most cases, the second best model for each clade specific  
258 dataset was the reversible model previously estimated for that dataset (e.g. Q.mammal is the  
259 second best dataset behind NQ.mammal for the mammal dataset).

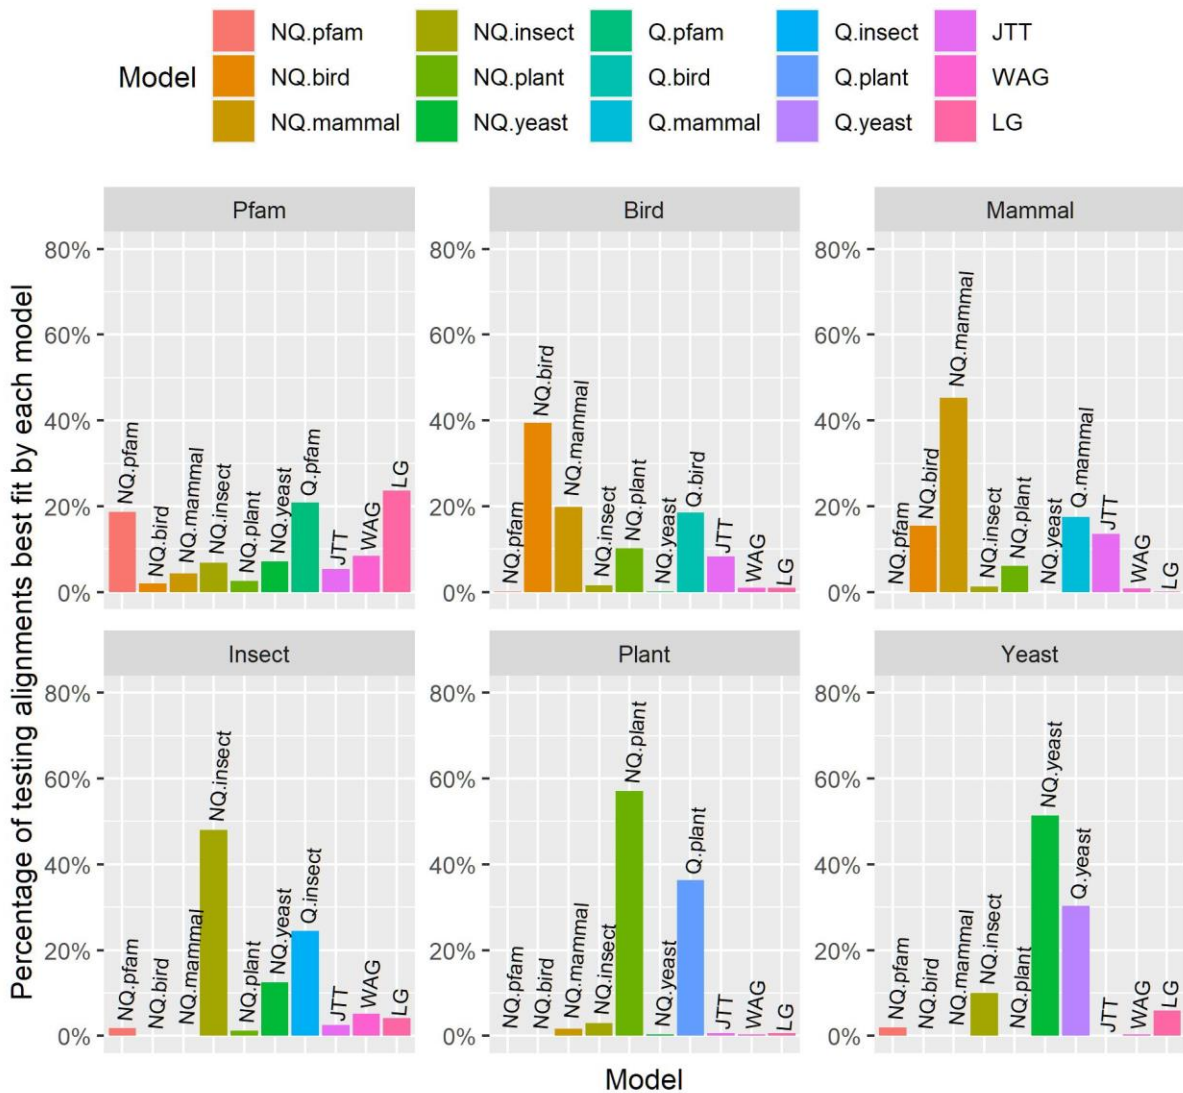

260

261 **Figure 2.** The percentage of testing alignments best fit by each model in Pfam and five clade-  
 262 specific datasets.

263 Many genome annotations are contaminated with Pfams that do not belong to the  
 264 ostensibly sequenced and assembled specie’s genome but to one of its parasites (Breitwieser,  
 265 et al., 2019; Salzberg, 2019). To obtain “cleaned” clade-specific data, James et al. (James, et  
 266 al., 2021) excluded all Pfam domains whose annotations suggested parasitic origin, e.g.  
 267 “viral” or “transcriptase”. We used their list of cleaned (white-listed) Pfams as a filter on our  
 268 training and testing Pfam sets to create a cleaned training Pfam set of 3655 MSAs and a  
 269 cleaned testing Pfam set of 3611 MSAs. We chose not to use a more thoroughly cleaned

270 version of the Pfam dataset including the removal of individual sites or sequences within each  
271 MSA as it might be too conservative and could eliminate informative data (Tan, et al., 2015).  
272 We then estimated a new non-reversible model from this cleaned Pfam dataset, which we call  
273 NQ.cPfram.

274 We compared the NQ.pfam model with the NQ.cPfam model estimated from the  
275 cleaned training Pfam set. Experiments showed that NQ.pfam was better than NQ.cPfam on  
276 2519 (69.7%) out of 3611 cleaned testing MSAs. The NQ.pfam model outperformed the  
277 NQ.cPfam model on 4774 (71.7%) testing MSAs from the original Pfam dataset. Thus, the  
278 contaminated MSAs in the Pfam dataset did not considerably affect the quality of the  
279 NQ.pfam model.

### 280 *Non-reversible model fit correlates with sequence lengths*

281 We first assessed the effect of single-locus alignment length on the model fit of NQ  
282 models on five clade-specific datasets. For each clade-specific dataset, we classified the test  
283 alignments into 10 bins by the alignment length, then calculated the Spearman correlation  
284 between the rank of the bin and the proportion of alignments which are best fit by the NQ  
285 model for that dataset. The results showed variable Spearman correlations among datasets:  
286 0.47 for NQ.Bird, 0.87 for NQ.insect, 0.56 for NQ.Mammal, -0.02 for NQ.Plant, and 0.42 for  
287 NQ.yeast, indicating that the link between single-locus alignment length and model fit varies  
288 considerably across datasets.

289 We also sought to examine the fit of the new NQ models on longer concatenated  
290 alignments. To do this, we examined the model fit of NQ models on concatenated alignments  
291 from clade-specific datasets with 1, 5, 10, 20, 50, 100, and 200 loci. For each number of loci,  
292 we randomly created 100 replicate concatenated alignments, then calculated the proportion of  
293 100 replicates where the NQ model was the best-fit model. For example, for the Plant dataset

294 and the case of 10 loci, we created 100 concatenated alignments each composed of 10  
295 different random loci selected from the Plant test dataset, then assessed the performance of  
296 NQ.plant on the 100 concatenated alignments. The results on five clade-specific datasets (see  
297 Figure 3) show that the proportion of replicates for which the NQ model is the best-fit model  
298 increases with the number of loci in the concatenated alignment. The NQ models  
299 outperformed the corresponding Q models on almost all concatenated alignments with  $\geq 20$   
300 loci, and on practically all concatenated alignments with  $>50$  loci (Figure 3). This result  
301 suggests that for phylogenomic datasets with many loci, non-reversible models will almost  
302 always outperform reversible models in terms of their model fit, and may therefore lead to  
303 more accurate estimation of trees and branch lengths in these cases.

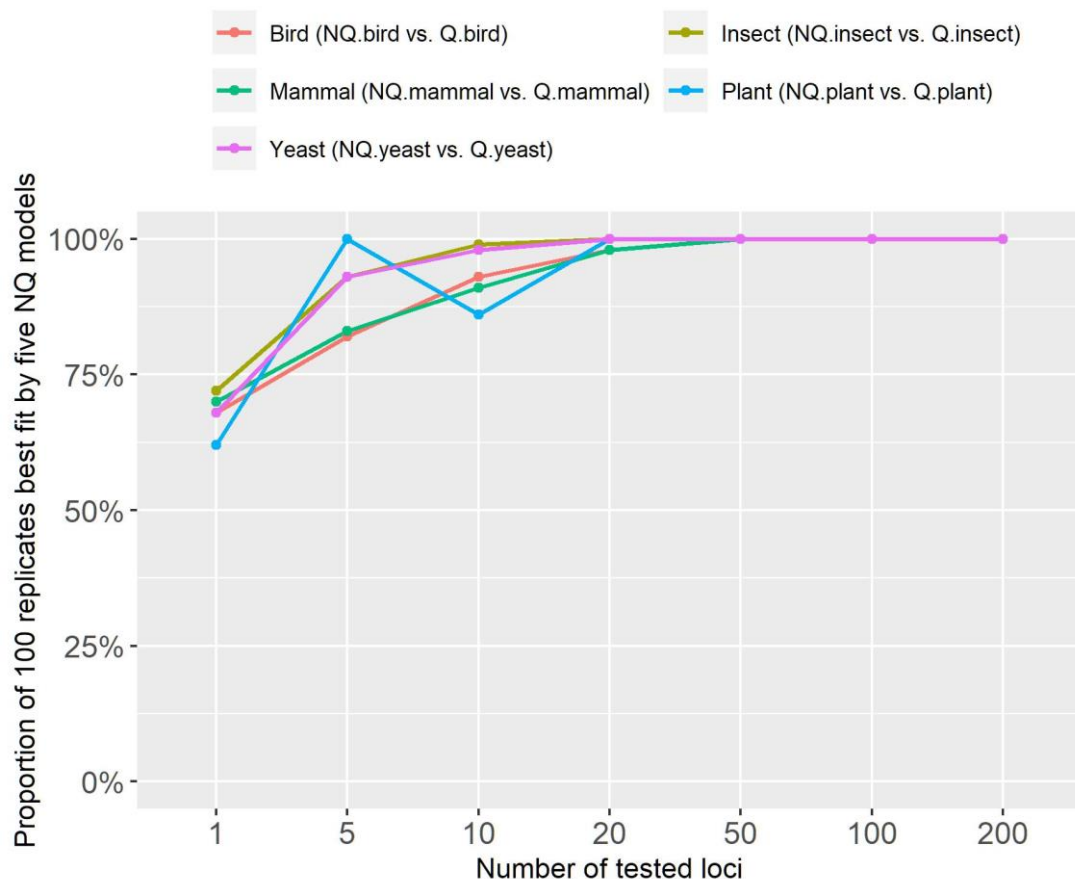

304

305 **Figure 3.** The proportion of 100 concatenated alignments best fit by non-reversible models  
306 on five clade-specific datasets.



307 *Analysis of the properties of non-reversible models*

308           We used principal component analysis (PCA) to visualize the difference between non-  
309 reversible and reversible models. Each model was represented by one vector of all amino acid  
310 substitution rates and subsequently analyzed by our R script. Figure 4 illustrates the PCA  
311 analysis of six non-reversible models and 25 existing reversible models. Figure 4 shows that  
312 the models group into three distinct clusters, i.e., one cluster of non-reversible models, one  
313 cluster of reversible models estimated from mitochondrial data, and another cluster of  
314 reversible models estimate from other genomic regions. This PCA analysis indicates that  
315 non-reversible models provided a very distinct pattern of amino acid substitutions not  
316 captured by existing reversible models. To understand these NQ matrix substitution patterns,  
317 we calculated the net flux between each amino acid pair for each clade. Figure 5 shows  
318 drastic departures from reversibility in all taxonomic groups, and substantial differences  
319 between them. The largest non-reversible fluxes are not between particularly codon-adjacent  
320 or (what are typically considered) chemically-similar amino acids. Further study is needed to  
321 understand the contributions of amino acid chemistry to the direction and magnitude of the  
322 fluxes, and thus to the non-reversible evolutionary process summarized in the NQ matrices.

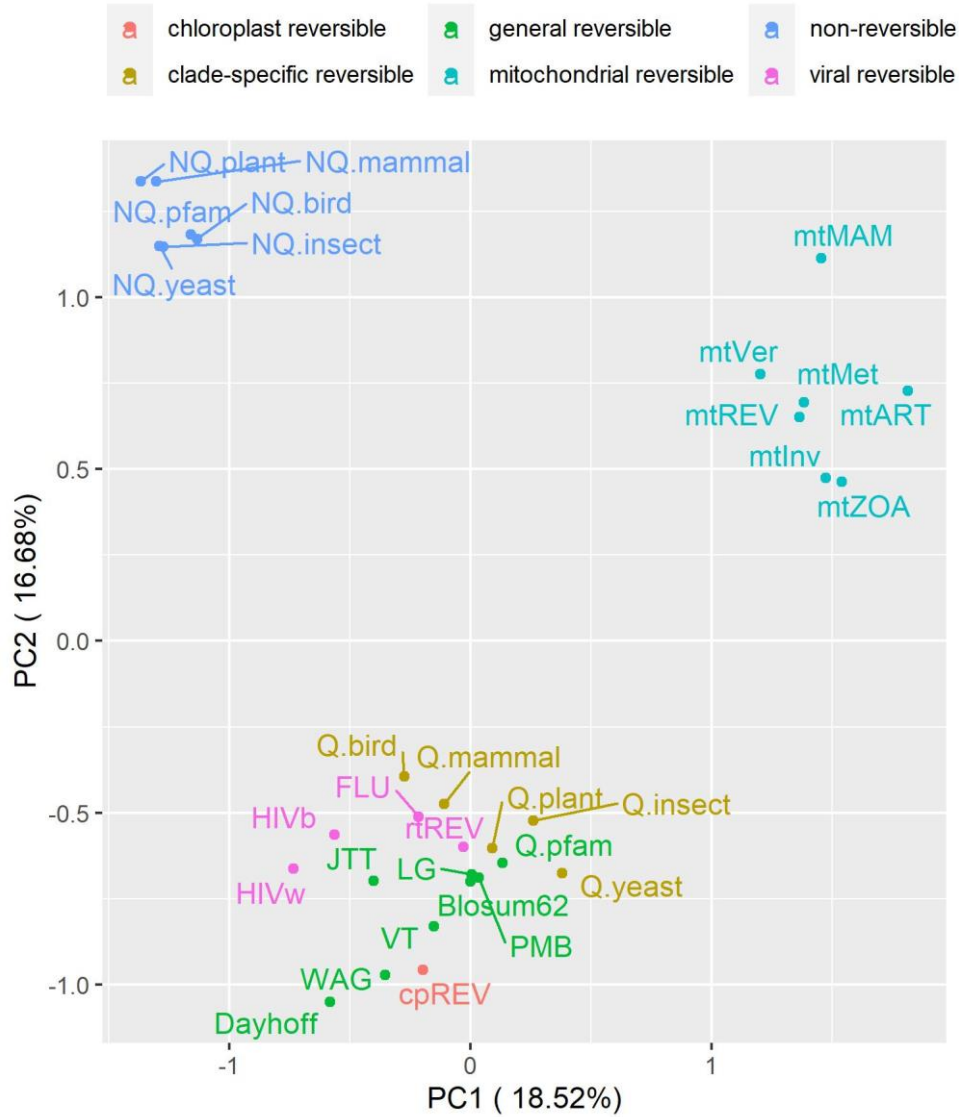

323

324 **Figure 4.** Principal component analysis of six non-reversible models and 25 reversible

325 models. The non-reversible models are grouped into one distinct cluster.

326

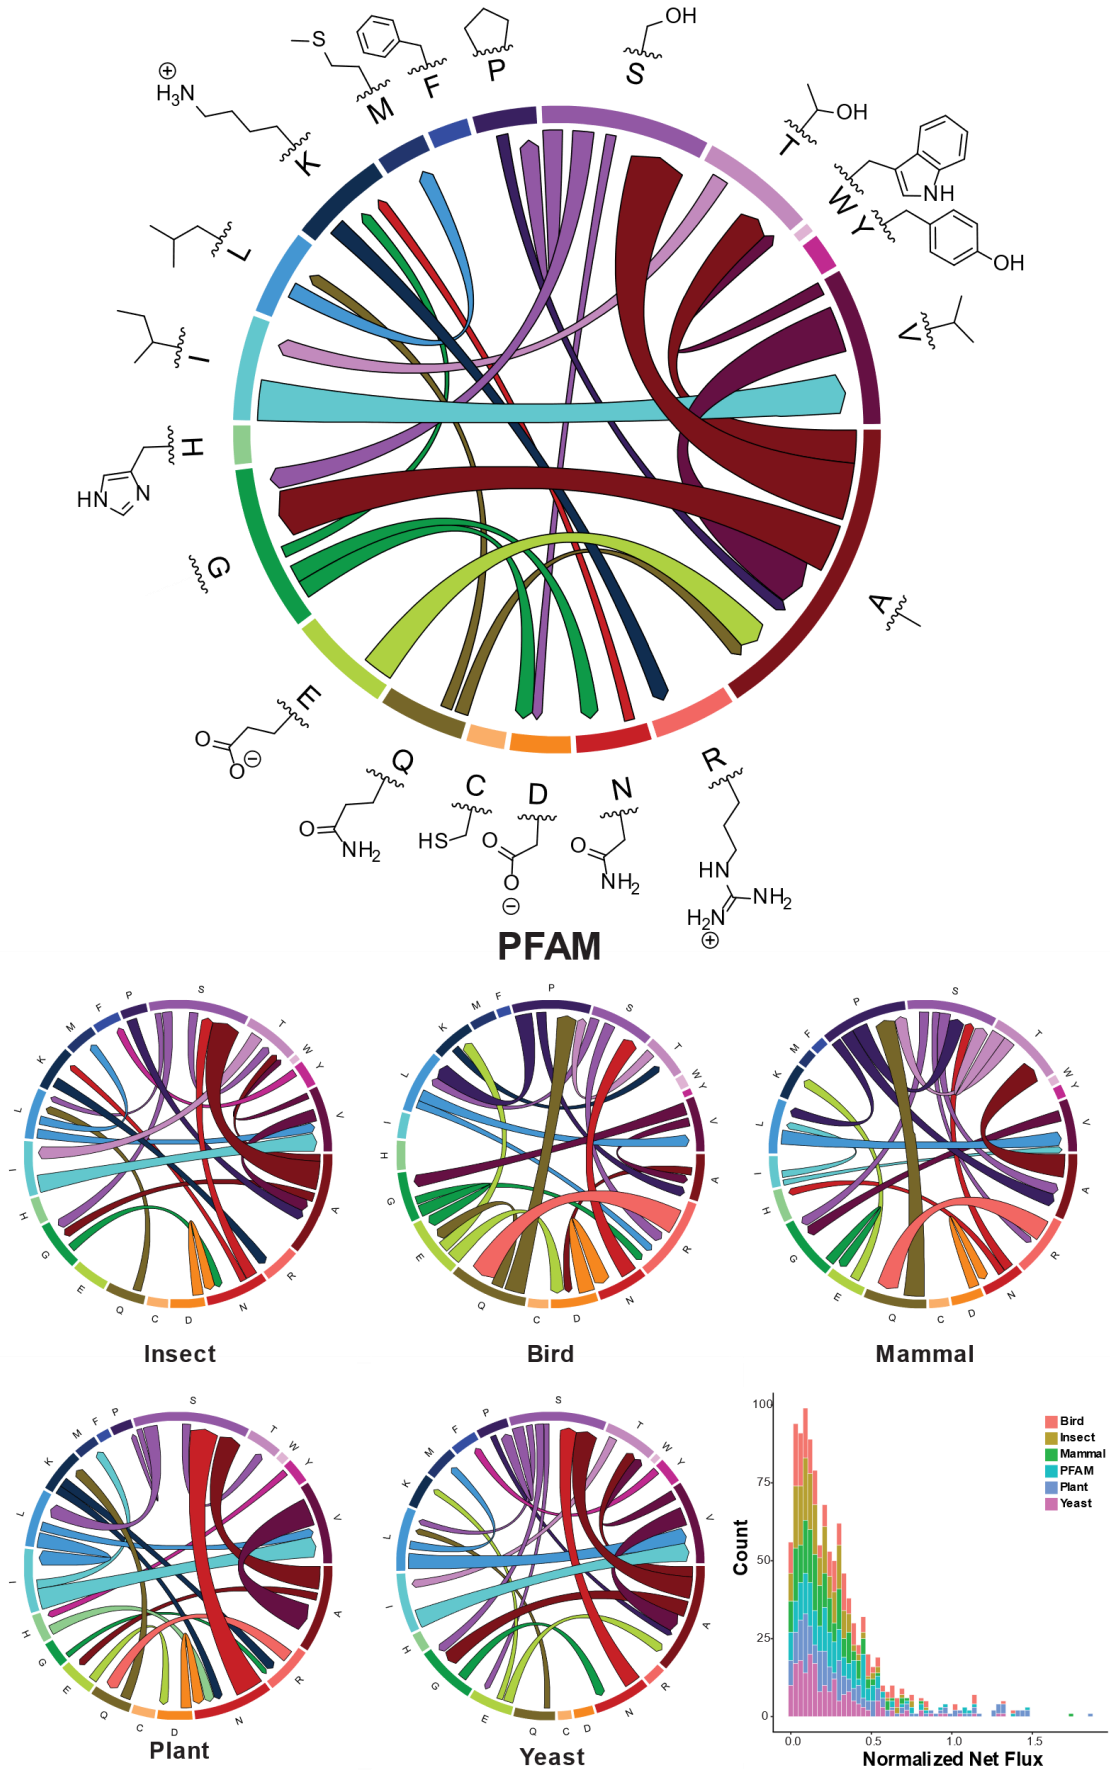

328 **Figure 5.** Departures from reversibility vary across taxonomic groups. Chord diagrams show  
329 net flux measurements between amino acids (represented by 1-letter codes and side-chain  
330 structures) calculated from non-reversible rate matrices, where net flux =  $|\text{flux}_{i \rightarrow j} - \text{flux}_{j \rightarrow i}| =$   
331  $|(\text{rate}_{i \rightarrow j} * \text{freq}_i) - (\text{rate}_{j \rightarrow i} * \text{freq}_j)|$ . The size of each band along the outer circle represents the  
332 equilibrium frequency of each amino acid, and the width of each chord at its attachment  
333 points is proportional to the magnitude of net flux between each pair of amino acids for that  
334 taxonomic group. For clarity, only the largest 5% of net fluxes are shown. Color in chord  
335 diagrams is for ease of interpretation and contains no extra information. Inset histogram  
336 shows the distribution of all normalized net flux values for each group, each equal to  $(2 * \text{net}$   
337  $\text{flux}_{ij}) / (\text{flux}_{i \rightarrow j} + \text{flux}_{j \rightarrow i})$ .

### 338 *Non-reversible models correctly inferred the root placement of reconstructed trees*

339 We assessed the root placement of trees reconstructed with non-reversible models  
340 from the two clade-specific datasets where previous publications have indicated a well-  
341 supported root placement, i.e., the plant tree from Ran et al. (Ran, et al., 2018) and the bird  
342 tree from Jarvis et al. (Jarvis, et al., 2015). The branches on reconstructed trees were labeled  
343 with rootstrap values (ranging from 0 to 1) calculated from 1000 bootstrap trees (Naser-  
344 Khdour, et al., 2021) to provide statistical support for the placement of the root on the  
345 branches. We also performed approximately unbiased (AU) test (Shimodaira, 2002) with  
346 1000 replicates for all branches to determine a confidence set of root branches (i.e., branches  
347 with  $p_{AU} > 0.05$  are considered as potential root branches and included into the confidence  
348 set) (Naser-Khdour, et al., 2021).

349 Figure 6 illustrates the plant rooted tree and the bird rooted tree reconstructed using  
350 NQ.plant and NQ.bird, respectively. The expected root branch, based on the analysis of (Ran,  
351 et al., 2018) using outgroups of the plant tree, belongs to the AU test confidence set and has a

352 rootstrap value of 1 (supported by all bootstrap trees). Similarly, the expected root branch,  
 353 based on the analysis of (Jarvis, et al., 2014) using outgroups, was confirmed by the AU test  
 354 and labeled with a very high rootstrap value of 0.998 (supported by 99.8% of bootstrap trees).  
 355 These results demonstrate that non-reversible models reconstructed rooted trees with high  
 356 confidence in root placements that agree with the roots inferred by outgroup rooting.

357

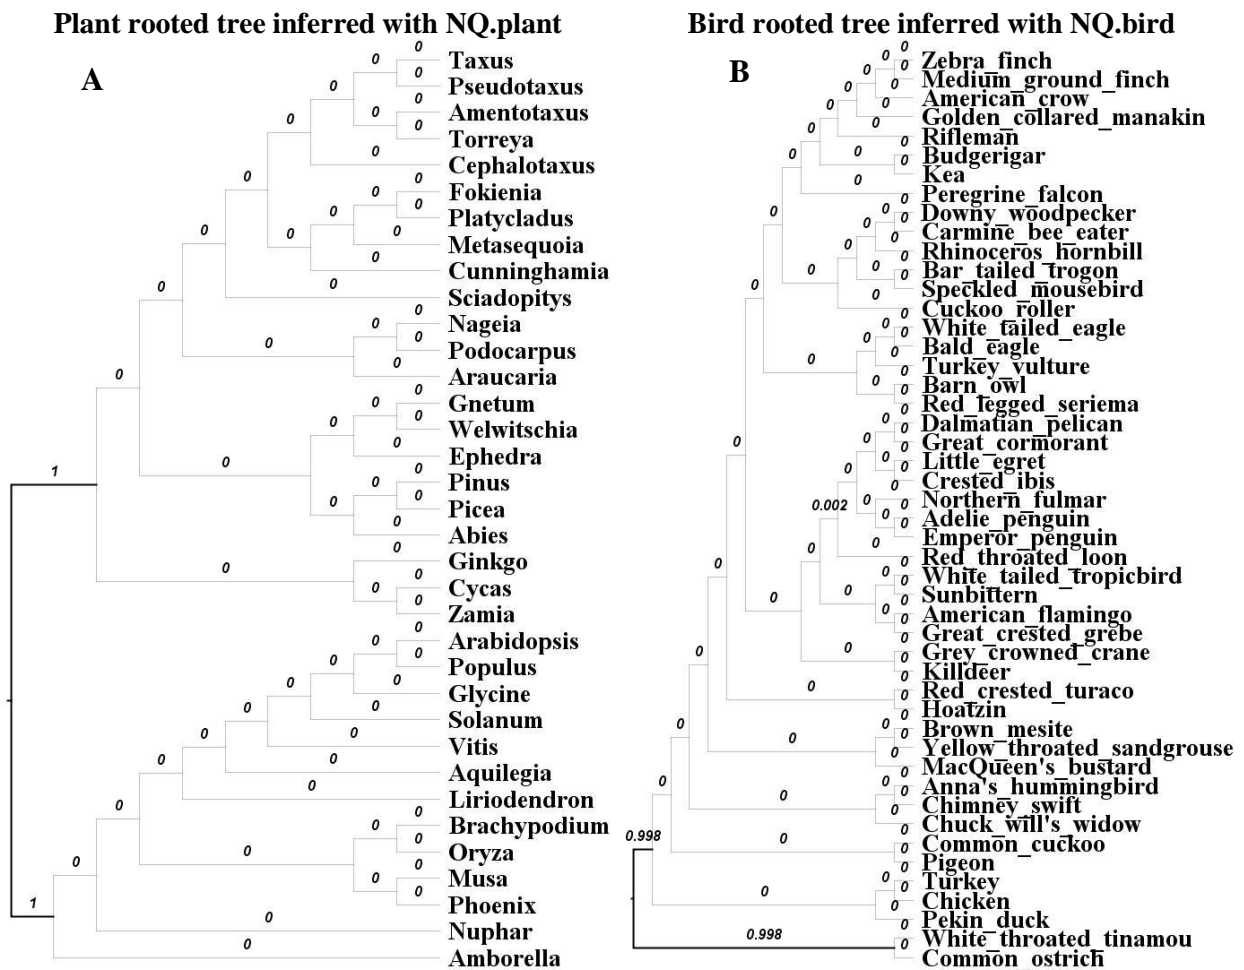

358 **Figure 6.** The plant rooted tree of 35 species (A) reconstructed from a concatenated protein  
 359 alignment of 1308 loci using IQ-TREE 2 with the NQ.plant model. The bird rooted tree of 48  
 360 species (B) reconstructed from a concatenated protein alignment of 8295 loci using the  
 361 NQ.bird model. Bold branches are branches contained in the confidence set of the AU test  
 362 and numbers displaying on branches are the rootstrap values.

363 *Non-reversible models inferred different locus trees and coalescent based species trees*

364           Next, we examined whether the six new non-reversible matrices can infer different  
365 tree topologies. For each single-locus MSA in each dataset, we inferred an unrooted ML tree  
366 using the best-fit model among nine published reversible models (JTT, WAG, LG, Q.pfam,  
367 Q.plam, Q.mammal, Q.bird, Q.insect and Q.yeast), which we call  $T_{REV}$ . We then performed a  
368 second IQ-TREE run considering 15 models, comprising the same nine reversible models but  
369 adding the six new non-reversible models (NQ.pfam, NQ.plant, NQ.mammal, NQ.bird,  
370 NQ.insect, or NQ.yeast), to infer another tree  $T_{NEW}$ . If one of the six NQ models fits the data  
371 better, then  $T_{NEW}$  will be rooted and will therefore differ from  $T_{REV}$ . In this case we launch  
372 another IQ-TREE run with a same matrix as  $T_{REV}$  but using a different random seed. We call  
373 the resulting tree  $T_{REV2}$ . Otherwise, if NQ models do not provide a better fit, then the 2<sup>nd</sup> run  
374 will use the same model as the first run but  $T_{NEW}$  might still be different from  $T_{REV}$  due to  
375 search heuristics. Thus, for each alignment we now have three trees  $T_{REV}$ ,  $T_{NEW}$ , and  $T_{REV2}$   
376 when a non-reversible model fits the data best.

377           We then compared the three trees for each alignment when a non-reversible model fits  
378 the data best using normalized Robinson-Foulds (nRF) distances. To calculate the nRF we  
379 first unrooted the rooted tree (if required) then used IQ-TREE to calculate the nRF with  
380 options -rf1 --normalize-dist. To ask whether non-reversible models lead to bigger changes in  
381 tree topologies than expected from search heuristics alone, we compared the two distributions  
382 of normalized Robinson-Foulds (nRF) (Robinson and Foulds 1981)  $nRF(T_{NEW}, T_{REV})$  and  
383  $nRF(T_{REV}, T_{REV2})$ . The two nRF distributions are depicted in Figure 7. We found that using  
384 non-reversible models changes locus tree topologies in every dataset (the red line) and,  
385 particularly in the Pfam dataset, changes are somewhat greater between reversible and non-  
386 reversible models than between reversible models initiated with different random seeds (the  
387 blue line).

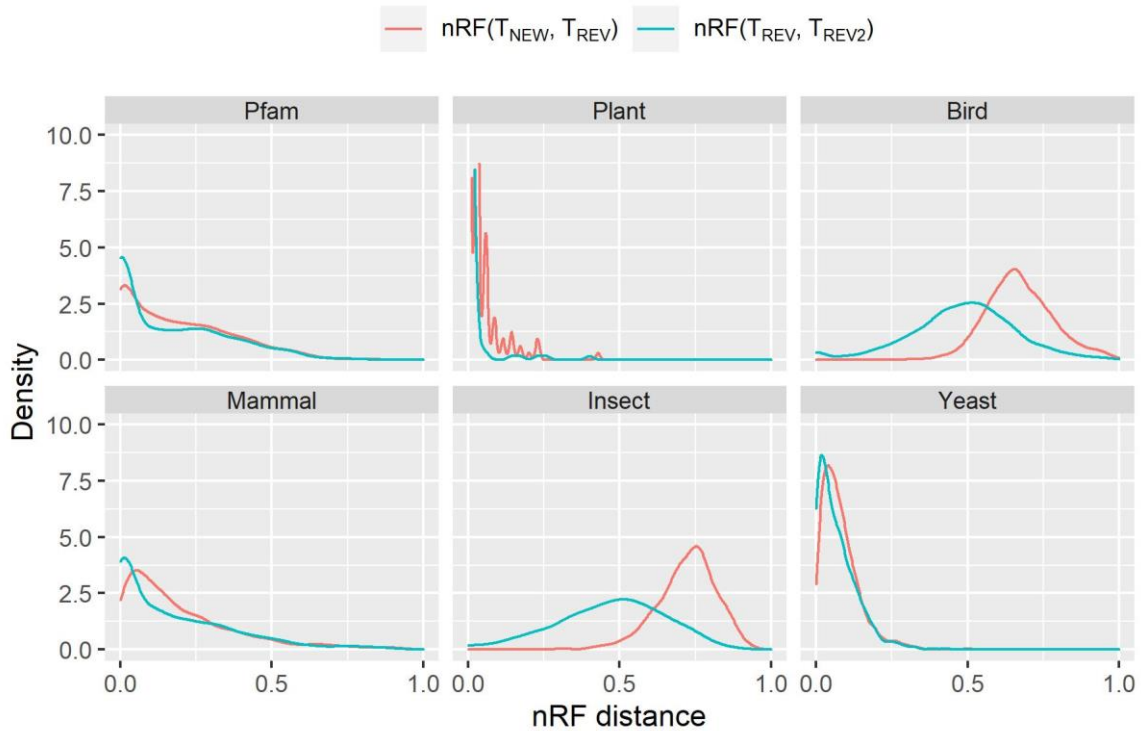

388

389 **Figure 7.** Distributions of normalized Robinson-Foulds (nRF) distances between the trees  
390 inferred by non-reversible and reversible models. The red line is the distribution where the  
391 best-fit model is one of the new non-reversible models inferred in this study (NQ.pfam,  
392 NQ.plant, NQ.mammal, NQ.bird, NQ.insect, or NQ.yeast). Comparing to best-fit reversible  
393 model, new model shows an effect on the tree topology (the best-fit reversible model is  
394 chosen from nine existing models Q.pfam, Q.plant, Q.mammal, Q.bird, Q.insect, Q.yeast,  
395 LG, JTT, or WAG; and is showed by the blue line).

396 Because of the observed differences between gene tree topologies, we examined to  
 397 what extent it influences the reconstruction of species trees using coalescent based methods.  
 398 These methods use distributions of single-locus trees to infer a species tree, so changes in the  
 399 underlying single-locus trees may affect species-tree inference. To this end, for each clade-  
 400 specific dataset, we used ASTRAL version 5.15 (Zhang, et al., 2018) to construct a species  
 401 tree  $ASTRAL_{REV}$  from the set of  $T_{REV}$  and a species tree  $ASTRAL_{NEW}$  from the set of  $T_{NEW}$   
 402 trees. For plant dataset, the  $ASTRAL_{REV}$  tree and the  $ASTRAL_{NEW}$  tree (Figure 8A) differ by  
 403 the position of a single taxon, *Liriodendron*. The topological differences are more pronounced  
 404 for Mammals, Insects, Yeasts, Birds with 2, 10, 15, and 17 different branches between the  
 405  $ASTRAL_{REV}$  and  $ASTRAL_{NEW}$  trees. Figure 8B highlights these differences for the Bird  
 406 dataset.

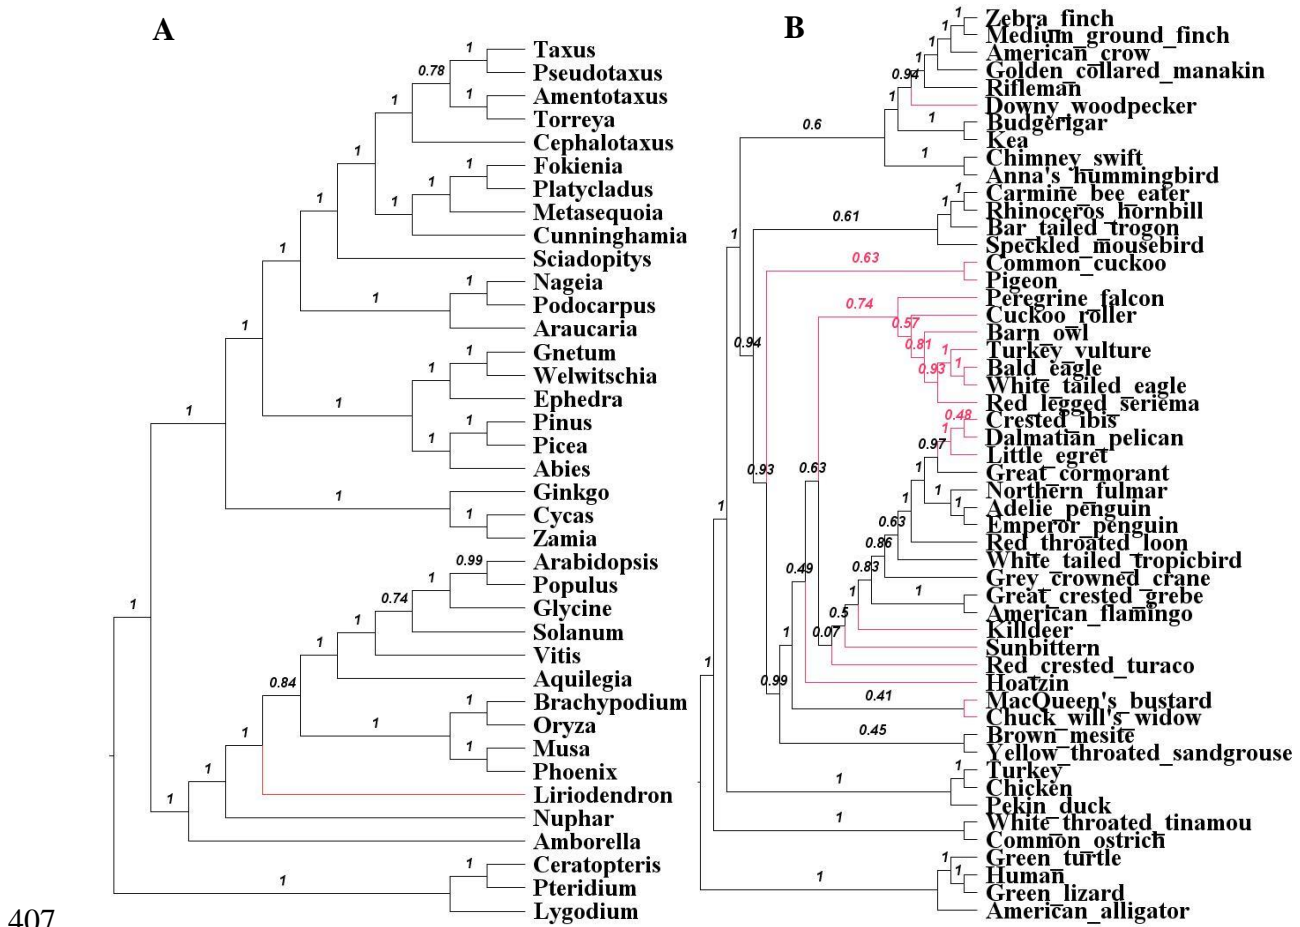



408 **Figure 8.** ASTRAL<sub>NEW</sub> species trees from Plant (A) and Bird (B) data reconstructed from the  
409 set of T<sub>NEW</sub> locus trees. Shown on each internal branch the ASTRAL local posterior  
410 probability.

411

## 412 **Discussion**

413 Most phylogenetic analyses of protein sequences use time-reversible substitution  
414 models, which can be limited in their ability to accurately model the biological process of  
415 amino acid substitution. Although estimating time non-reversible models is complicated and  
416 computationally expensive (e.g., 105 days with a computer of 36 cores for estimating  
417 NQ.pfam), it has the potential to allow model of sequence evolution to better reflect the  
418 underlying evolutionary mechanisms, and hence could improve the estimation of  
419 evolutionary relationships and timescales among species.

420 In this paper, we introduced a new approach, nQMaker, to estimate non-reversible  
421 models from large datasets including hundreds to thousands of MSAs. We applied nQMaker  
422 to estimate six non-reversible models: a general protein model from Pfam and five clade-  
423 specific datasets for birds, insects, mammals, plants, and yeasts respectively. Our analyses  
424 show that the non-reversible models capture a distinct pattern of amino acid substitutions not  
425 captured by the traditional reversible models, that the non-reversible models affect the  
426 inference of tree topologies, and allow for the estimation of root positions without outgroups.

427 Our results show that non-reversible models are often selected in preference to  
428 reversible models, and that this tendency increases with the size of the alignment. Non-  
429 reversible models were selected using standard model selection approaches for most single-  
430 locus alignments. In concatenated multi-locus alignments, non-reversible models tended to be

431 the best fit model in practically all datasets with at least 20 loci. The trees inferred with non-  
432 reversible models were often topologically different from those constructed with reversible  
433 models, suggesting that when a non-reversible model is the best-fit model for a dataset,  
434 topological accuracy of phylogenetic inference may be improved.

435         Rooting phylogenetic trees is an essential task in studying evolutionary relationships  
436 among species. This is normally accomplished by using outgroup species or additional  
437 assumptions such as molecular clocks (Huelsenbeck, et al., 2002). Non-reversible models  
438 provide an alternative approach that implicitly enables the reconstruction of rooted trees as  
439 part of the model. Our analyses of Bird and Plant datasets with non-reversible models  
440 identified the root of the trees of these groups with a very high statistical confidence that  
441 agree with previous studies (Ran, et al., 2018; Jarvis, et al., 2015). Together with other  
442 encouraging results on mammals (Naser-Khdour, et al., 2021) and from simulated data  
443 (Bettisworth & Stamatakis, 2021), this provides increasing evidence that non-reversible  
444 models are effective and accurate in identifying root placements for empirical datasets, and  
445 will especially be useful when an appropriate outgroup is difficult to obtain.

446         The non-reversible models consist of 379 parameters, the pairwise substitution rates  
447 between 20 amino-acids. Therefore, they should be estimated from large datasets consisting  
448 of hundreds to thousands MSAs to avoid over-fitting the data. The six non-reversible rate  
449 matrices we estimate in this study are now available in the latest version of IQ-TREE 2,  
450 allowing researchers to readily utilize these models for their datasets. We recommend that  
451 users perform model selection to determine the best fit model for any specific alignment  
452 under study, and note that it is possible to combine both reversible and non-reversible models  
453 in a single partitioned analysis. The nQMaker algorithm is implemented in IQ-TREE 2, so  
454 researchers can estimate non-reversible models from their own datasets. For example, the

455 NQ.plant model was estimated from 1000 plant alignments in 1.5 days using a computer with  
456 36 cores.

457 A limitation of our models is that while relaxing the time reversibility, they still  
458 assume stationarity, i.e., the amino acid frequencies stay constant along the tree. However,  
459 the stationary assumption is highly likely to be violated during the evolution of distantly  
460 related proteins, e.g., between bacteria and eukaryotes. Failure to account to heterogeneous  
461 sequence composition might mislead phylogenetic reconstruction. Apart from non-stationary  
462 models, one can also use a mixture model of several Q matrices such as C10-C60, LG4M and  
463 LG4X (Le, et al., 2012). Therefore, deriving non-stationary and/or mixture amino acid  
464 models will be an important avenue of future research.

## 465 **Conflicts of interests**

466 We declare that we have no conflict of interests.

## 467 **Funding**

468 This research was funded by the Vietnam National Foundation for Science and  
469 Technology Development (NAFOSTED; [102.01.2019.06 to B.Q.M., C.C.D., and L.S.V.], an  
470 Australian National University Futures Grant to R.L., an Australian Research Council  
471 Discovery Grant [DP200103151 to R.L. and B.Q.M.], a Chan-Zuckerberg Initiative Grant for  
472 Essential Open Source Software for Science to B.Q.M. and R.L., and a NASA Astrobiology  
473 Program ICAR grant [80NSSC21K0592] to J.M.

## 474 **References**

475 Akaike, H., 1974. A new look at the statistical model identification. *IEEE Trans Autom*  
476 *Control*, p. 19:716–23.

- 477 Bettisworth, B. & Stamatakis, A., 2021. Root Digger: a root placement program for  
478 phylogenetic trees. *BMC Bioinformatics*, Volume 22, p. 225.
- 479 Breitwieser, F. P., Perteza, M., Zimin, A. V. & Salzberg, S. L., 2019. Human contamination in  
480 bacterial genomes has created thousands of spurious proteins.. *Genome research*, 6,  
481 29(6), pp. 954-960.
- 482 Dang, C. C. et al., 2014. FastMG: a simple, fast, and accurate maximum likelihood procedure  
483 to estimate amino acid replacement rate matrices from large data sets. *BMC*  
484 *Bioinformatics*, Volume 15, p. 341.
- 485 Duchêne, D. A. et al., 2019. Linking Branch Lengths across Sets of Loci Provides the  
486 Highest Statistical Support for Phylogenetic Inference. *Molecular Biology and*  
487 *Evolution*, 12, Volume 37, pp. 1202-1210.
- 488 El-Gebali, S. et al., 2018. The Pfam protein families database in 2019. *Nucleic Acids*  
489 *Research*, 10, Volume 47, pp. D427-D432.
- 490 Felsenstein, J., 1981. Evolutionary trees from DNA sequences: A maximum likelihood  
491 approach. *Journal of Molecular Evolution*, Volume 17, p. 368–376.
- 492 Gu, X., Fu, Y.-X. & Li, W.-H., 1995. Maximum likelihood estimation of the heterogeneity of  
493 substitution rate among nucleotide sites. *Molecular Biology and Evolution*, 12(4), p.  
494 546–557.
- 495 Huelsenbeck, J. P., Bollback, J. P. & Levine, A. M., 2002. Inferring the Root of a  
496 Phylogenetic Tree. *Systematic Biology*, 1, Volume 51, pp. 32-43.
- 497 James, J. E. et al., 2021. Universal and taxon-specific trends in protein sequences as a  
498 function of age.. *eLife*, 1. Volume 10.
- 499 Jarvis, E. D. et al., 2014. Whole-genome analyses resolve early branches in the tree of life of  
500 modern birds. *Science*, Volume 346, p. 1320–1331.

- 501 Jarvis, E. D. et al., 2015. Phylogenomic analyses data of the avian phylogenomics project.  
502 *GigaScience*, 2. Volume 4.
- 503 Jones DT, T. W. T. J., 1992. The rapid generation of mutation data matrices from protein  
504 sequences. *Bioinformatics*, 8(3), pp. 275-282.
- 505 Le, S. Q., Dang, C. C. & Gascuel, O., 2012. Modeling Protein Evolution with Several Amino  
506 Acid Replacement Matrices Depending on Site Rates. *Molecular Biology and*  
507 *Evolution*, 4, Volume 29, pp. 2921-2936.
- 508 Le, S. Q. & Gascuel, O., 2008. An improved general amino acid replacement matrix.  
509 *Molecular Biology and Evolution*, p. 25:1307–20.
- 510 Maddison, W. P., Donoghue, M. J. & Maddison, D. R., 1984. Outgroup Analysis and  
511 Parsimony. *Systematic Biology*, 3, Volume 33, pp. 83-103.
- 512 Minh, B. Q., Dang, C. C., Vinh, L. S. & Lanfear, R., 2021. QMaker: Fast and accurate  
513 method to estimate empirical models of protein evolution. *Systematic Biology*.
- 514 Minh, B. Q. et al., 2020. IQ-TREE 2: New models and efficient methods for phylogenetic  
515 inference in the genomic era. *Molecular Biology and Evolution*, 11, 37(5), p. 1530–  
516 1534.
- 517 Misof, B. et al., 2014. Phylogenomics resolves the timing and pattern of insect evolution.  
518 *Science*, Volume 346, p. 763–767.
- 519 Naser-Khdour, S., Minh, B. Q. & Lanfear, R., 2021. Assessing Confidence in Root  
520 Placement on Phylogenies: An Empirical Study Using Non-Reversible Models for  
521 Mammals. *Systematic Biology*.
- 522 Naser-Khdour, S. et al., 2019. The Prevalence and Impact of Model Violations in  
523 Phylogenetic Analysis. *Genome Biology and Evolution*, 9, Volume 11, pp. 3341-3352.

- 524 Nguyen, L.-T., Schmidt, H. A., von Haeseler, A. & Minh, B. Q., 2014. IQ-TREE: A Fast and  
525 Effective Stochastic Algorithm for Estimating Maximum-Likelihood Phylogenies.  
526 *Molecular Biology and Evolution*, 11, Volume 32, pp. 268-274.
- 527 Pearson, T. et al., 2013. When Outgroups Fail; Phylogenomics of Rooting the Emerging  
528 Pathogen, *Coxiella burnetii*. *Systematic Biology*, 7, Volume 62, pp. 752-762.
- 529 Ran, J.-H., Shen, T.-T., Wang, M.-M. & Wang, X.-Q., 2018. Phylogenomics resolves the  
530 deep phylogeny of seed plants and indicates partial convergent or homoplastic  
531 evolution between Gnetales and angiosperms. *Proceedings of the Royal Society B:*  
532 *Biological Sciences*, Volume 285, p. 20181012.
- 533 Robinson, D. F. & Foulds, L. R., 1981. Comparison of phylogenetic trees. *Mathematical*  
534 *Biosciences*, Volume 53, pp. 131-147.
- 535 Salzberg, S. L., 2019. Next-generation genome annotation: we still struggle to get it right.  
536 *Genome Biology*, Volume 20, p. 92.
- 537 Sayyari, E., Whitfield, J. B. & Mirarab, S., 2017. Fragmentary Gene Sequences Negatively  
538 Impact Gene Tree and Species Tree Reconstruction. *Molecular Biology and*  
539 *Evolution*, 10, Volume 34, pp. 3279-3291.
- 540 Shen, X.-X. et al., 2018. Tempo and Mode of Genome Evolution in the Budding Yeast  
541 Subphylum. *Cell*, Volume 175, pp. 1533 - 1545.e20.
- 542 Shimodaira, H., 2002. An Approximately Unbiased Test of Phylogenetic Tree Selection.  
543 *Systematic Biology*, 5, Volume 51, pp. 492-508.
- 544 Squartini, F. & Arndt, P. F., 2008. Quantifying the Stationarity and Time Reversibility of the  
545 Nucleotide Substitution Process. *Molecular Biology and Evolution*, 8, Volume 25, pp.  
546 2525-2535.

- 547 Tan, G. et al., 2015. Current Methods for Automated Filtering of Multiple Sequence  
548 Alignments Frequently Worsen Single-Gene Phylogenetic Inference. *Systematic*  
549 *Biology*, 6, Volume 64, pp. 778-791.
- 550 Whelan, S. & Goldman, N., 2001. A General Empirical Model of Protein Evolution Derived  
551 from Multiple Protein Families Using a Maximum-Likelihood Approach. *Molecular*  
552 *Biology and Evolution*, 5, Volume 18, pp. 691-699.
- 553 Wu, S., Edwards, S. & Liu, L., 2018. Genome-scale DNA sequence data and the evolutionary  
554 history of placental mammals. *Data in Brief*, Volume 18, pp. 1972-1975.
- 555 Yang, Z., 1993. Maximum-likelihood estimation of phylogeny from DNA sequences when  
556 substitution rates differ over sites. *Molecular Biology and Evolution*, pp. 10:1396-  
557 1401.
- 558 Yang, Z., 1995. A space-time process model for the evolution of DNA sequences. *Genetics*,  
559 Volume 139, p. 993–1005.
- 560 Zhang, C., Rabiee, M., Sayyari, E. & Mirarab, S., 2018. ASTRAL-III: polynomial time  
561 species tree reconstruction from partially resolved gene trees. *BMC Bioinformatics*,  
562 Volume 19, p. 153.
- 563
